# Supplementary figures and images for: Gas chromatography-mass spectrometric analysis of trimethylsilyl derivatives of toxic hydrolyzed products of nerve agent VX and its analogues for verification of Chemical Weapons Convention
Source: Royal Society of Chemistry journal article supplement (doi:10.1039/c0ay00089b), 2010-01-01

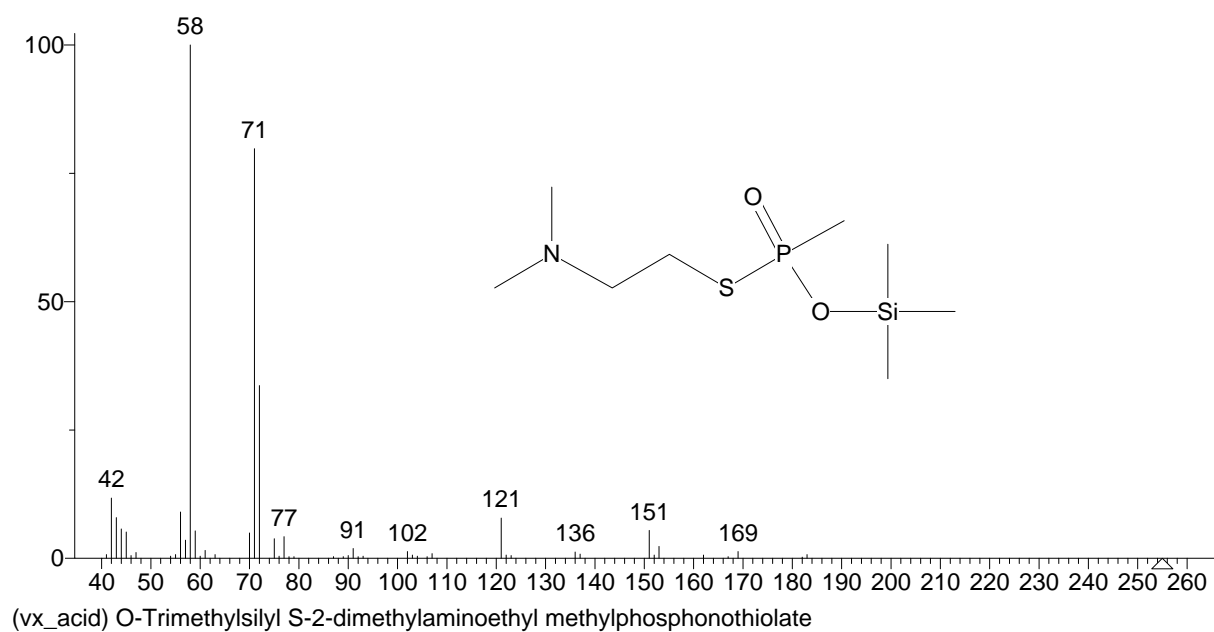

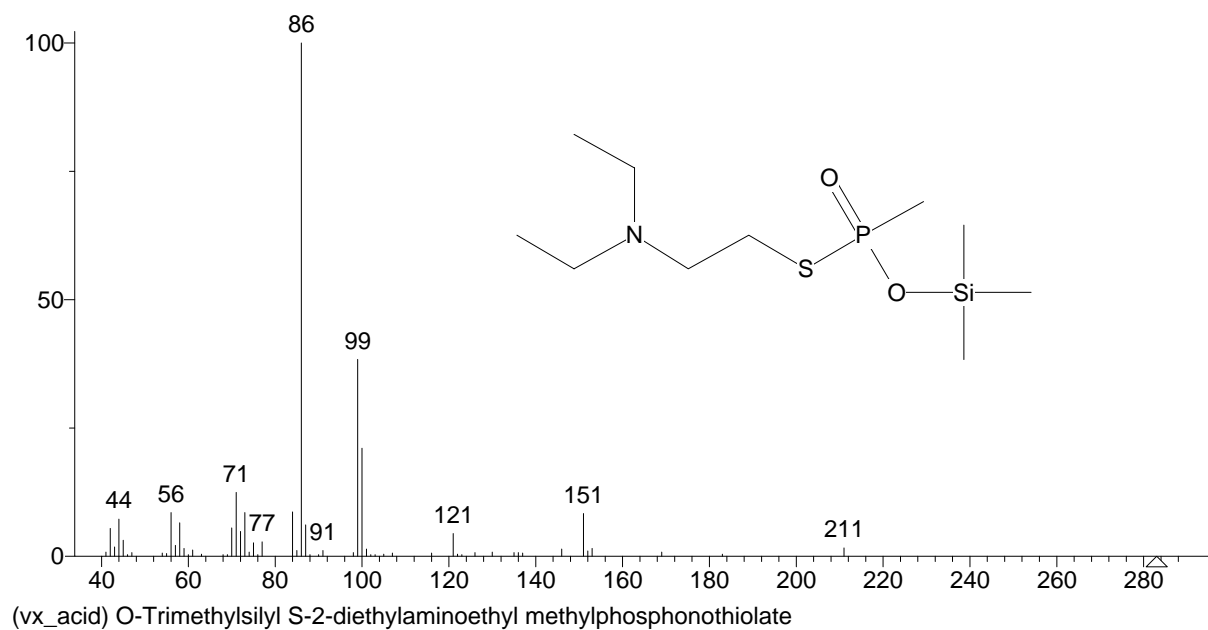

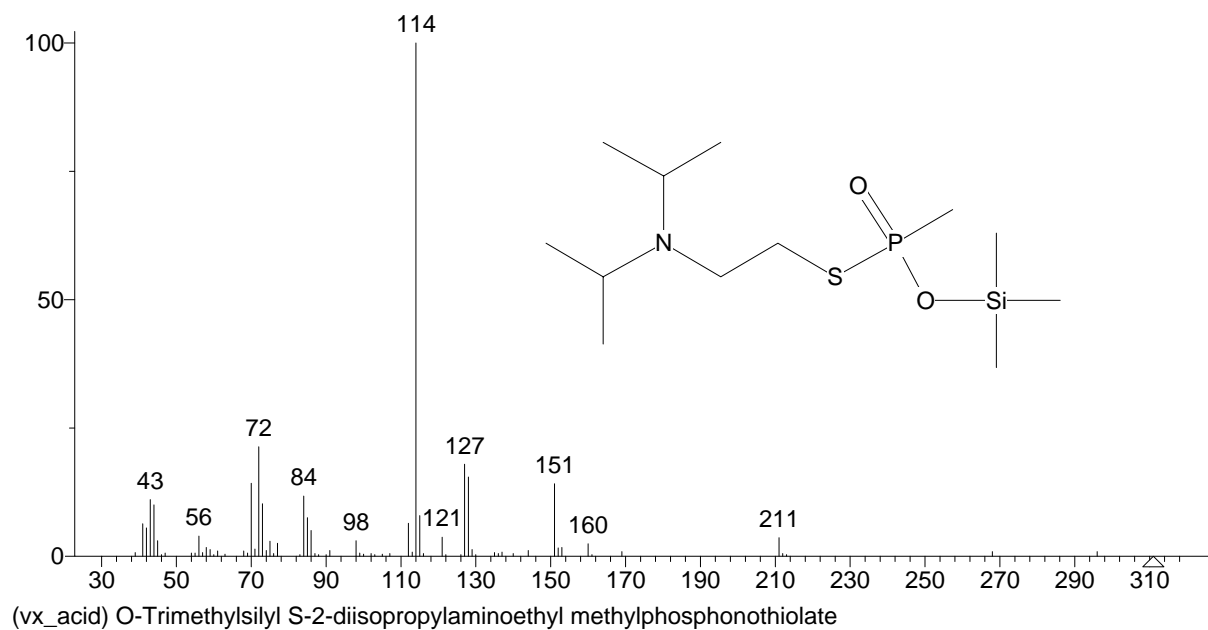

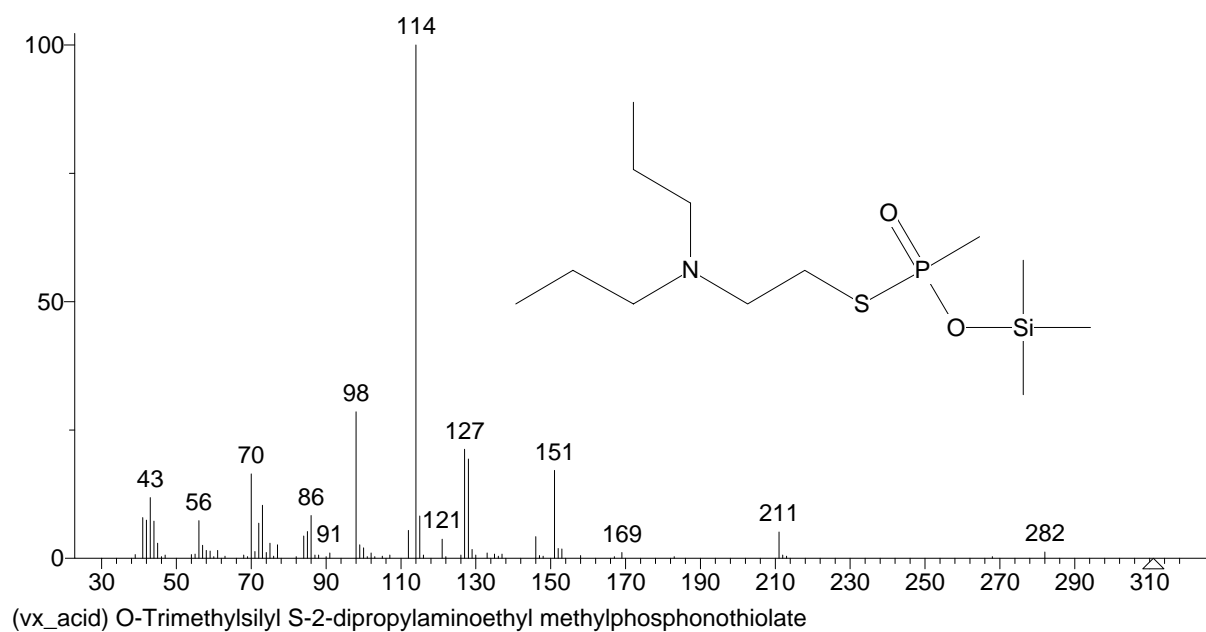

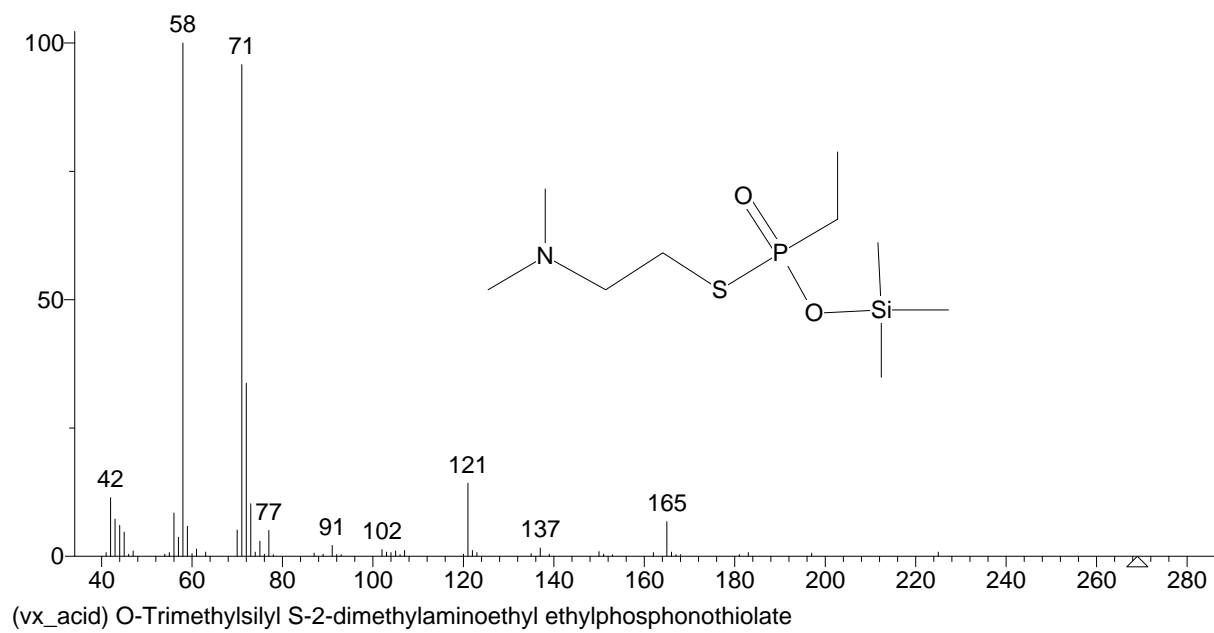

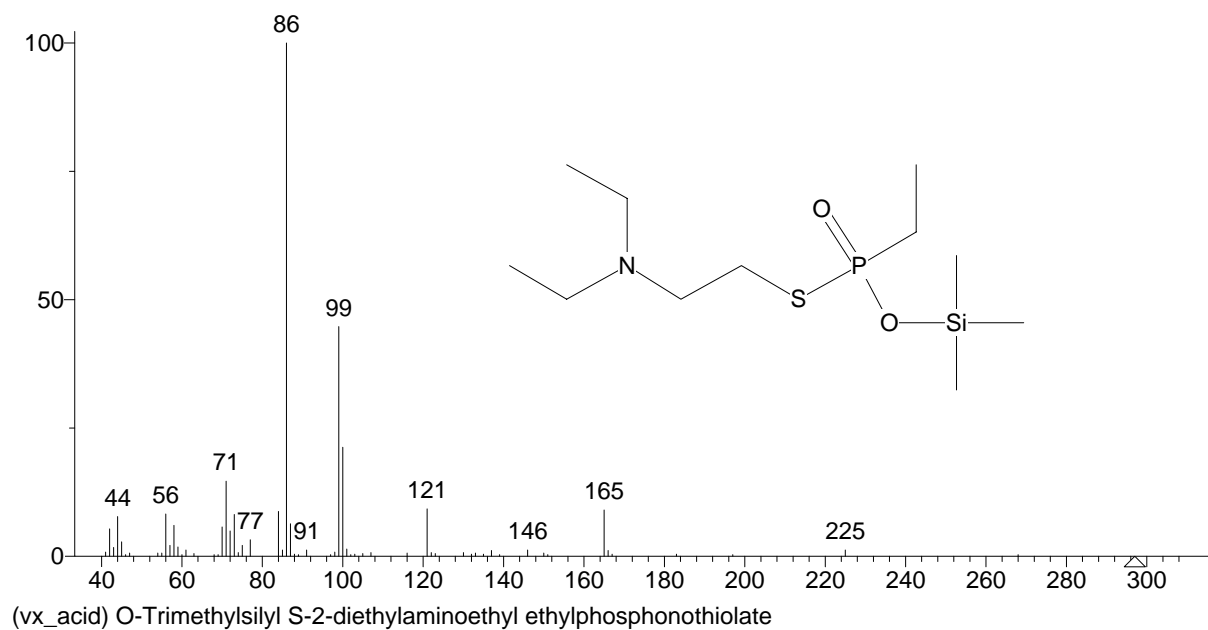

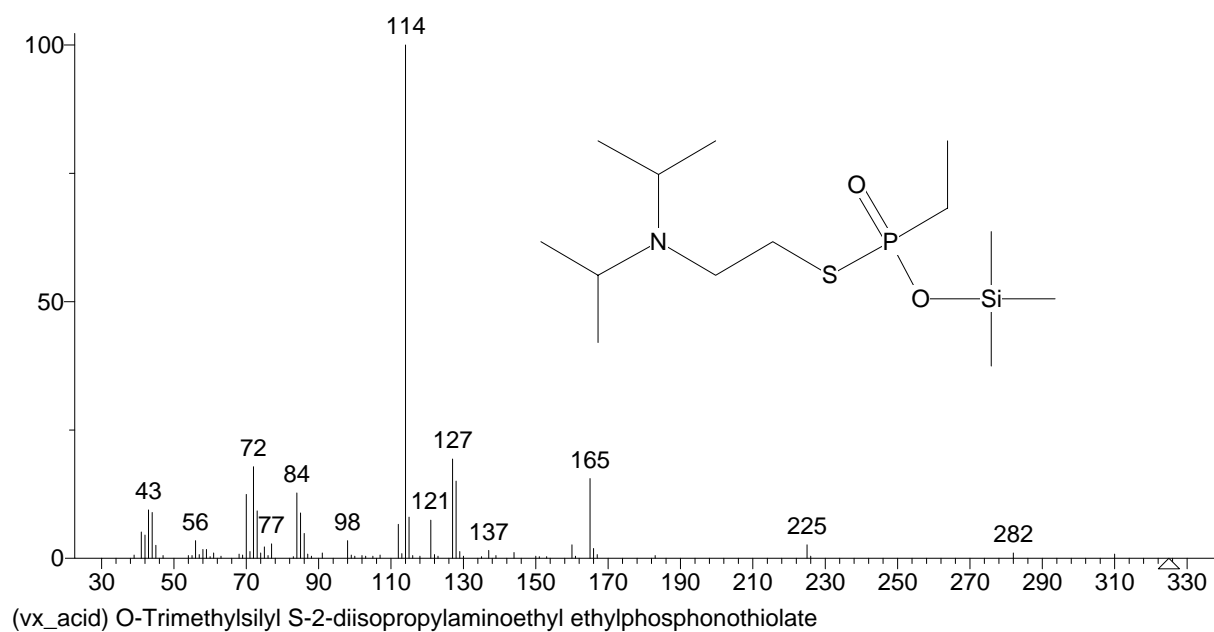

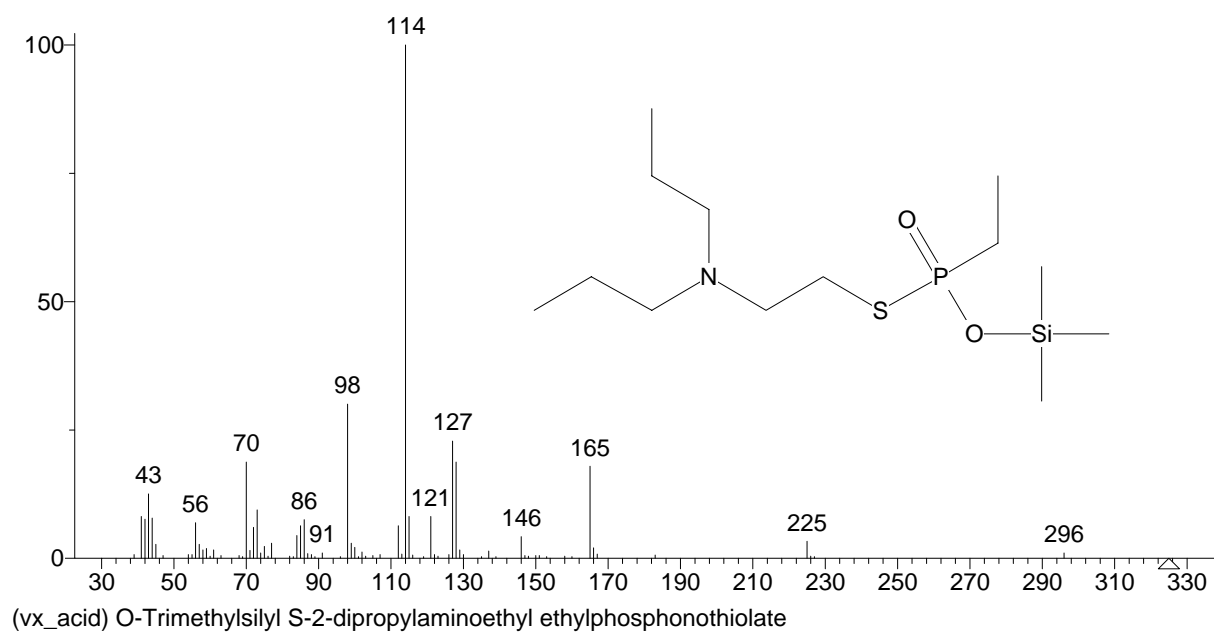



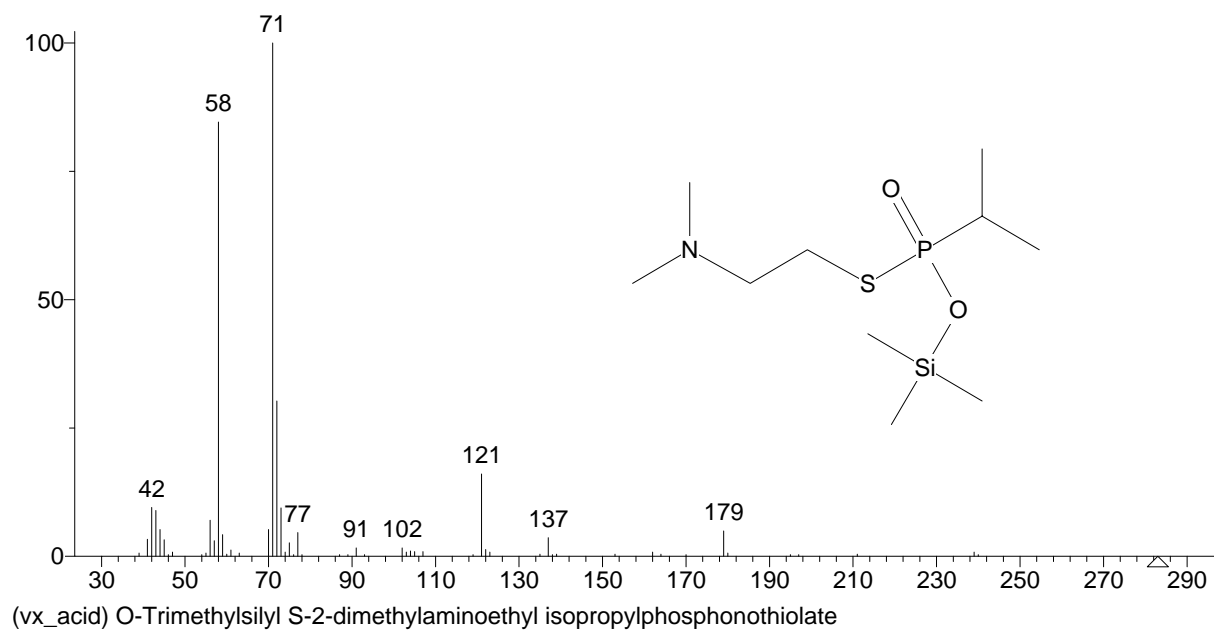

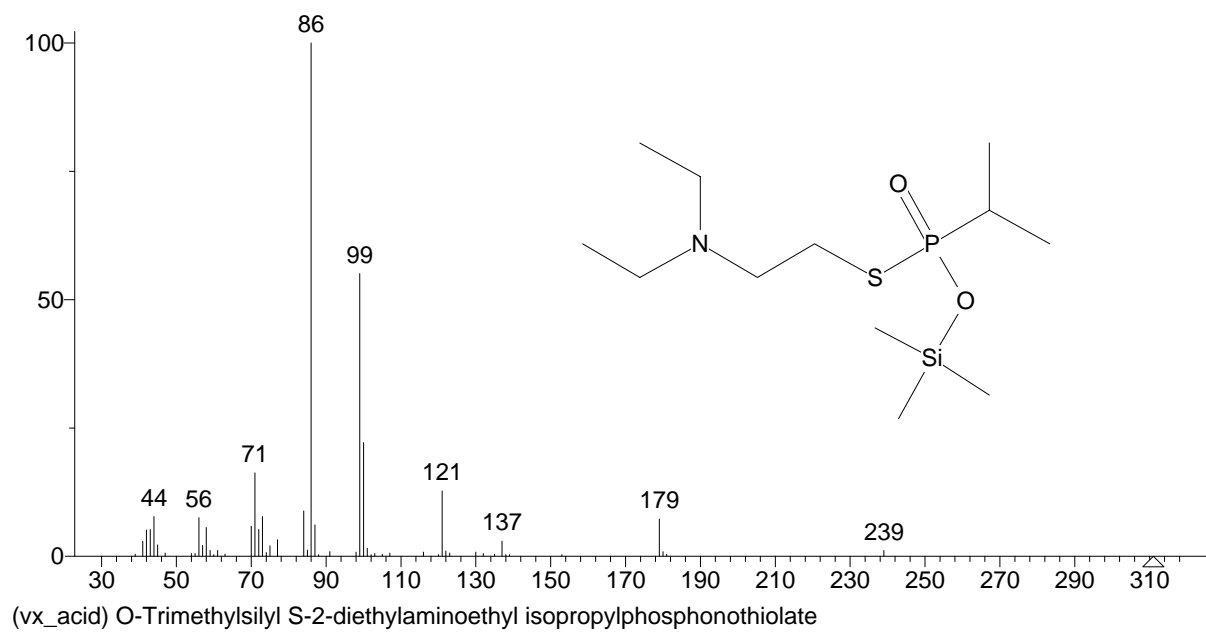

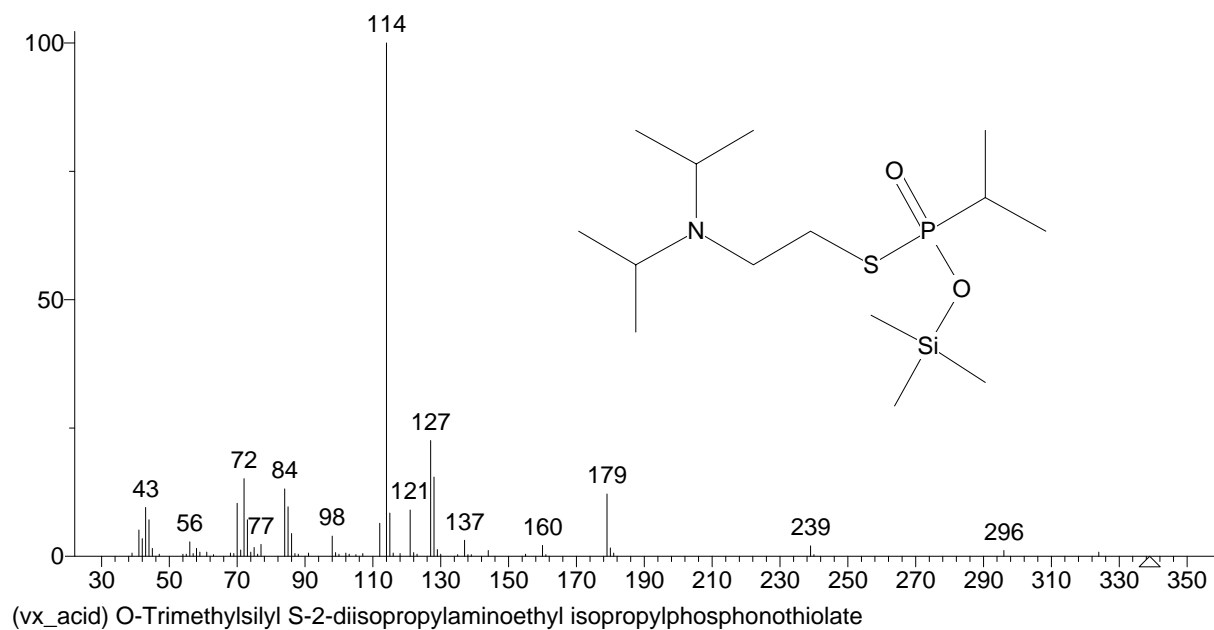

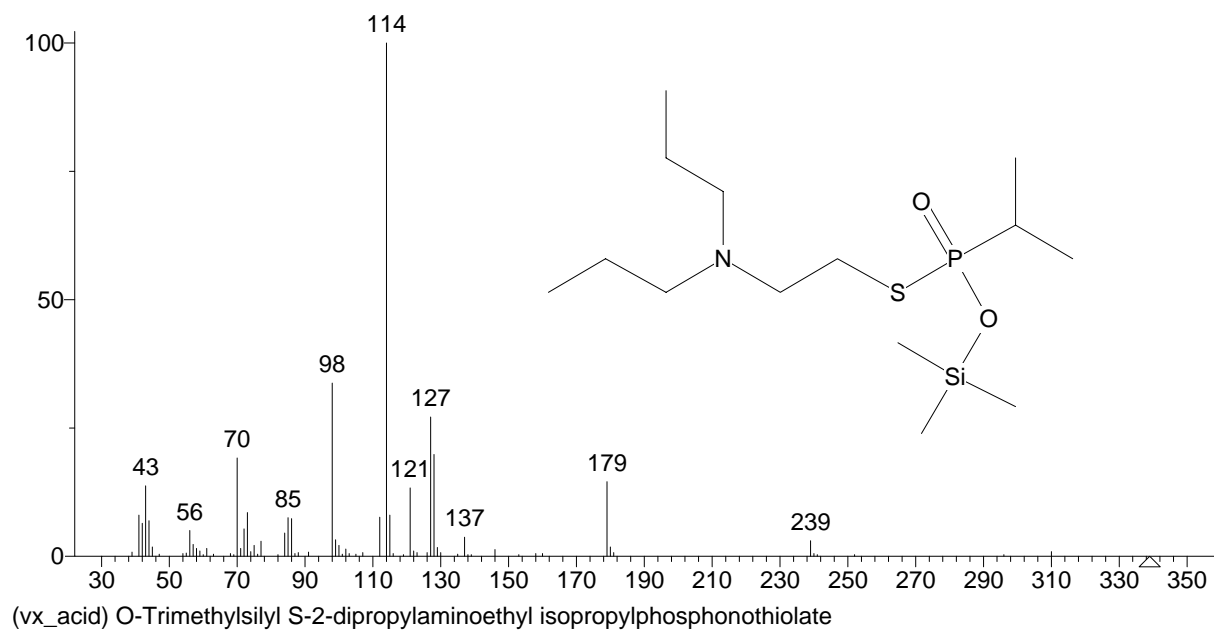

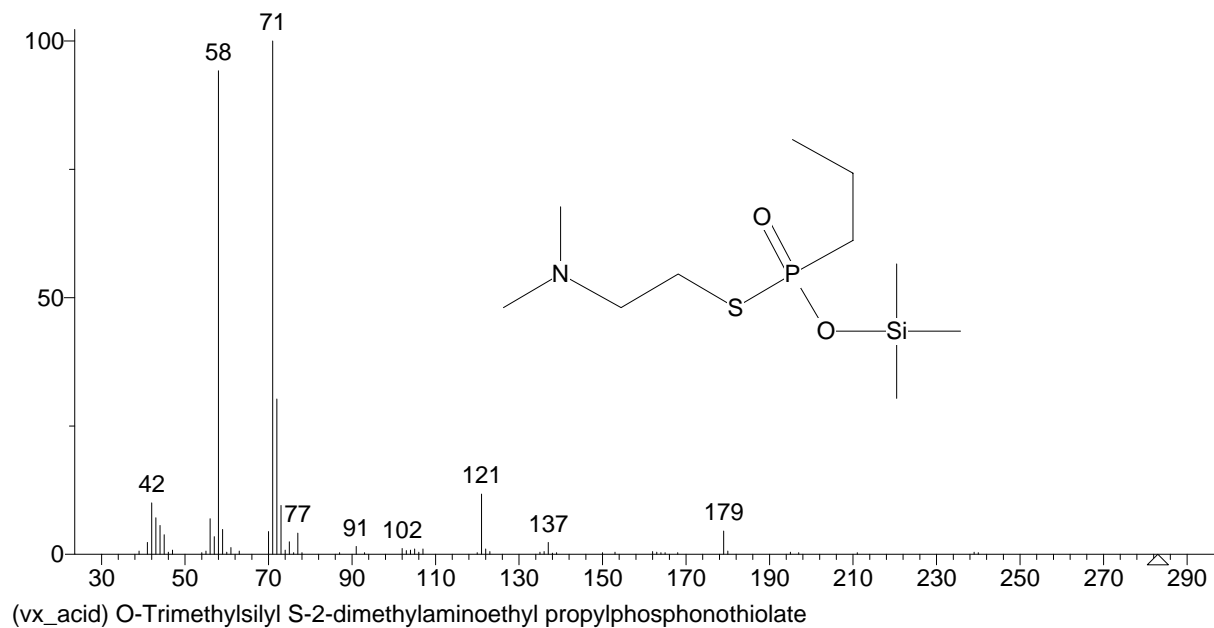

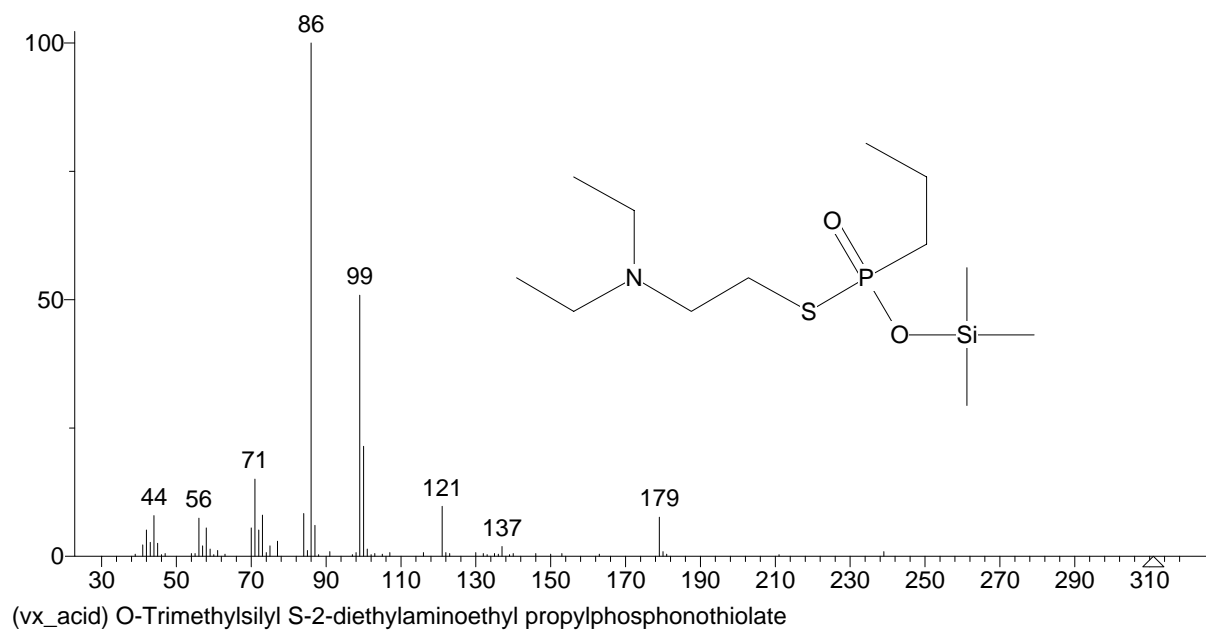

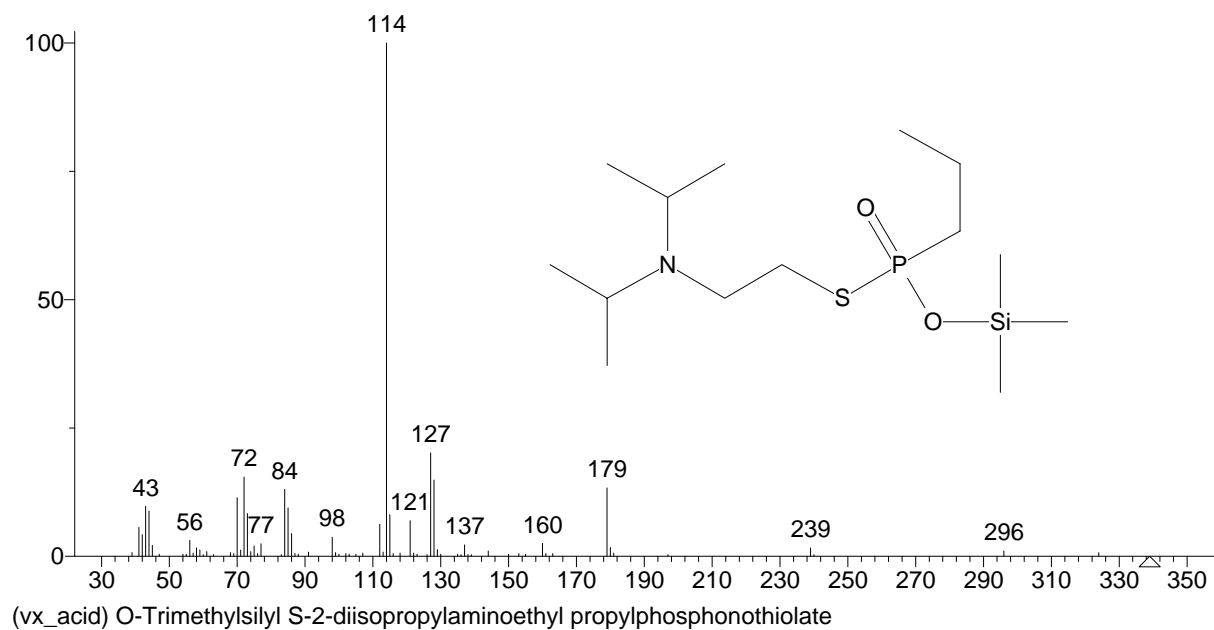

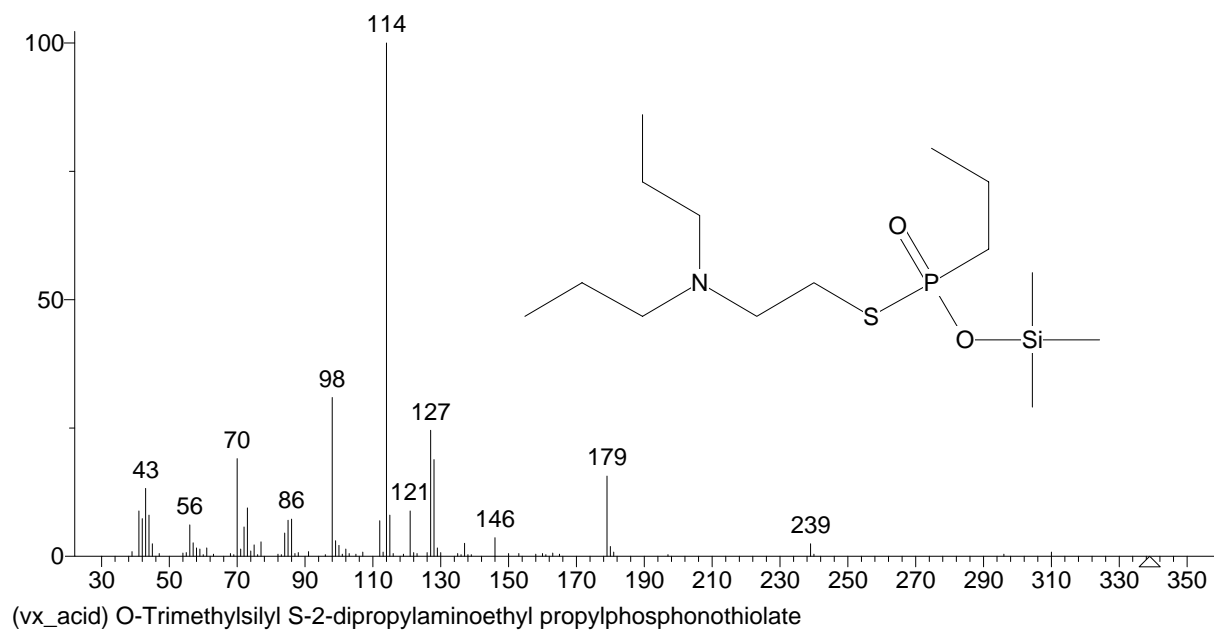



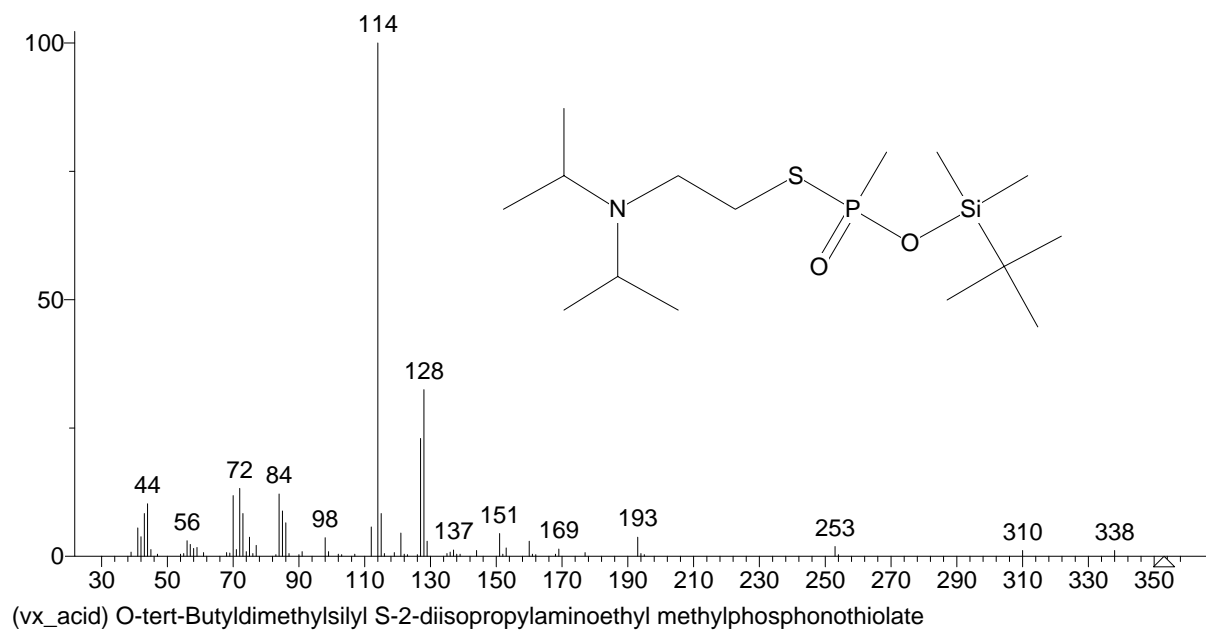

Supplement: c0ay00089b.pdf [file c0ay00089b.pdf]
